# Supplementary material
Source: publisher figshare collection journal article supplement (https://acs.figshare.com/ndownloader/files/22780214)
Supplement: Supplementary file 1 [file 22780214]

## SUPPORTING INFORMATION FOR

# Characterization of the DNA and Membrane Interactions of a Bio-reducible Cell-penetrating Foldamer in its Monomeric and Dimeric Form

Christopher Aisenbrey<sup>1</sup>, Céline Douat<sup>2,&</sup>, Antoine Kichler<sup>3</sup>, Gilles Guichard<sup>2</sup> and Burkhard Bechinger<sup>1,4,\*</sup>

<sup>1</sup>Université de Strasbourg / CNRS, UMR7177, Institut de chimie, 4, rue Blaise Pascal, 67070 Strasbourg, France

<sup>2</sup>Univ. Bordeaux, CNRS, Bordeaux INP, CBMN, UMR 5248, Institut Européen de Chimie et Biologie, 2 rue Robert Escarpit, 33607 Pessac, France

<sup>3</sup>Université de Strasbourg / CNRS, UMR7199, Faculté de Pharmacie, 74, route du Rhin, 67401 Illkirch, France

<sup>4</sup>Institut Universitaire de France

&present address: Department of Pharmacy, Ludwig-Maximilians-Universität Butenandtstraße 5-13, D-81377 Munich – Germany

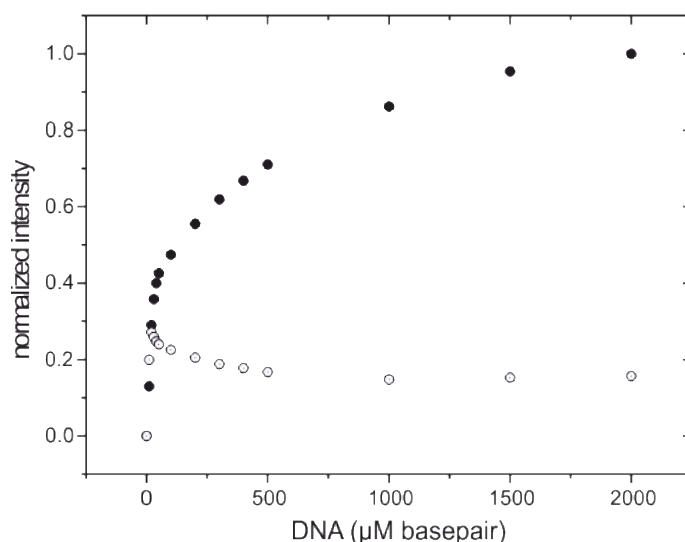

**Figure S1:** PCA deconvolution of states during monomer **3** association with DNA at pH 5. The closed circles represent the dominant component and the open circles a second component.

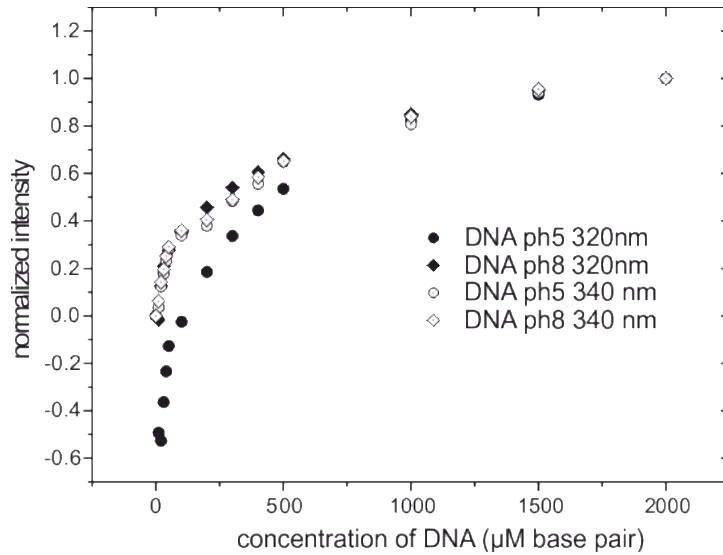

**Figure S2:** Normalized emission signal of oligourea monomer **3** at 320 nm (closed symbols) and 340 nm (open symbols) at pH 5 (circles) and pH 8 (diamonds)

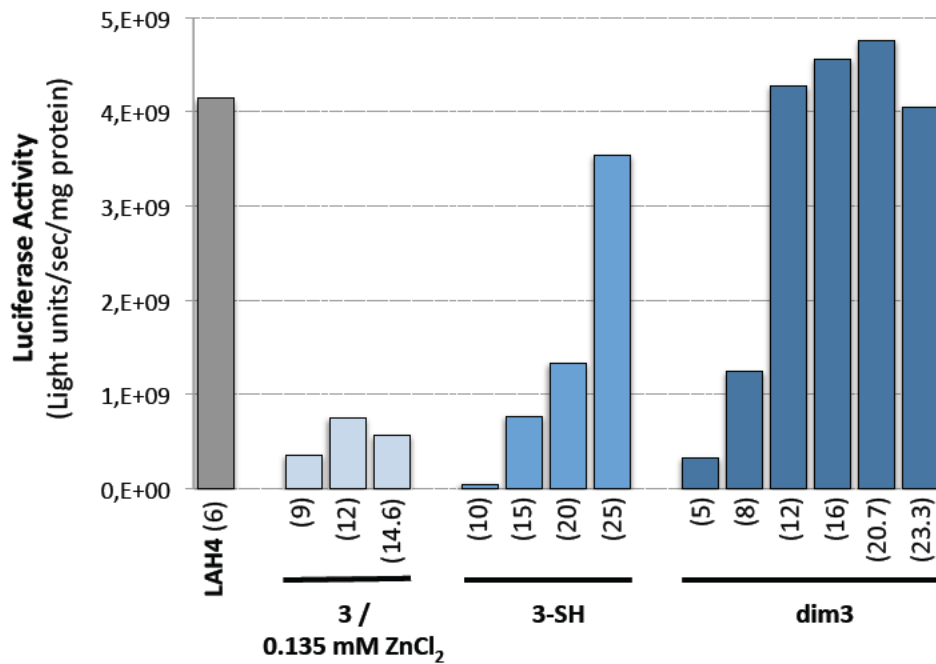

**Figure S3:** Transfection of a Human embryonic kidney cell line (HEK293 cells) with the plasmid *p-luc* encoding the luciferase gene complexed with different cationic vectors: the LAH4 peptide, oligourea **3** with 0.135 mM ZnCl<sub>2</sub>, **3-SH** and **dim3** at the vector/DNA mass ratios indicated in brackets. Notably, at **dim3**/DNA ratios > 20 toxic effects were observed. The cell assay was performed in 24-well plates in duplicates with 1.5 μg of *p-luc*/well. The transfection efficiency was measured after 28h and it is expressed as light units/s/mg protein and is the mean of the duplicates.
